# Supplementary material for: Partial sleep restriction-induced changes in stress, quality of life, and lipid metabolism in relation to cold hypersensitivity: A before-and-after intervention study
Source: PubMed Central journal article supplement — Medicine (Baltimore). 2022 Nov 18;101(46):e31933. doi: 10.1097/MD.0000000000031933 (PMC9678581; doi:10.1097/md.0000000000031933), 2022-11-18
Supplement: medi-101-e31933-s001.pdf [file medi-101-e31933-s001.pdf]

**Supplement 1. Effects of sleep restriction and follow-up on variables in the CH and non-CH groups**

| Variable /Time   | CH group   | Non-CH group | P-value             | Interaction time x group <sup>†</sup> |                    |
|------------------|------------|--------------|---------------------|---------------------------------------|--------------------|
|                  |            |              |                     | Effect size                           | P-value            |
| Stress (Score)   |            |              |                     |                                       |                    |
| Baseline         | 15.9±1.08  | 14.8±0.96    | 0.42 <sup>a</sup>   | 0.053                                 | 0.003 <sup>*</sup> |
| After SR         | 21±1.14    | 16.3±1.01    | 0.028 <sup>b*</sup> |                                       |                    |
| Follow-up        | 15.5±1.03  | 14.5±0.91    | 0.658 <sup>c</sup>  |                                       |                    |
| QOL (score)      |            |              |                     |                                       |                    |
| Baseline         | 0.94±0.01  | 0.97±0.01    | 0.049 <sup>a*</sup> | 0.07                                  | 0.001 <sup>*</sup> |
| After SR         | 0.91±0.01  | 0.98±0.01    | 0.010 <sup>b*</sup> |                                       |                    |
| Follow-up        | 0.98±0.01  | 0.98±0.01    | 0.161 <sup>c</sup>  |                                       |                    |
| Cortisol (ug/dL) |            |              |                     |                                       |                    |
| Baseline         | 11.1±0.6   | 12.7±0.54    | 0.041 <sup>a*</sup> | 0.019                                 | 0.118              |
| After SR         | 16.3±0.57  | 15.9±0.51    | 0.858 <sup>b</sup>  |                                       |                    |
| Follow-up        | 11.6±0.67  | 12.5±0.6     | 0.467 <sup>c</sup>  |                                       |                    |
| TC (mg/dL)       |            |              |                     |                                       |                    |
| Baseline         | 179.1±4.22 | 185.8±3.75   | 0.235 <sup>a</sup>  | 0.019                                 | 0.119              |
| After SR         | 170.9±4.24 | 183.5±3.76   | 0.086 <sup>b</sup>  |                                       |                    |
| Follow-up        | 179.8±4.18 | 188.2±3.71   | 0.269 <sup>c</sup>  |                                       |                    |
| HDL-C (mg/dL)    |            |              |                     |                                       |                    |
| Baseline         | 57.6±1.9   | 56.2±1.69    | 0.602 <sup>a</sup>  | 0.002                                 | 0.748              |
| After SR         | 54.7±1.8   | 53.8±1.6     | 0.250 <sup>b</sup>  |                                       |                    |
| Follow-up        | 59±1.93    | 57.4±1.71    | 0.771 <sup>c</sup>  |                                       |                    |
| LDL-C(mg/dL)     |            |              |                     |                                       |                    |
| Baseline         | 106.9±3.75 | 111.5±3.33   | 0.36 <sup>a</sup>   | 0.029                                 | 0.043 <sup>*</sup> |
| After SR         | 101.4±3.83 | 112.2±3.4    | 0.041 <sup>b*</sup> |                                       |                    |
| Follow-up        | 107.5±3.77 | 112.2±3.35   | 0.900 <sup>c</sup>  |                                       |                    |

CH, cold hypersensitivity; QOL, quality of life; TC, total cholesterol; HDL-C, high-density lipoprotein cholesterol; LDL-C, low-density lipoprotein cholesterol.

Data are shown as estimated mean and standard error.

\* P-value < 0.05.

† Two-way repeated-measures ANOVA analysis.

<sup>a</sup> P-values are based on independent t-tests between the CH and non-CH groups in the baseline.

<sup>b-c</sup> P-values are based ANCOVA analysis adjusted for sex, age, and baseline values of each outcome variable; (b) after sleep restriction, (c) follow-up.
